# Supplementary material for: Lytic and Latent Genetic Diversity of the Epstein–Barr Virus Reveals Raji-Related Variants from Southeastern Brazil Associated with Recombination Markers
Source: MDPI journal article supplement (doi:10.3390/ijms25095002), 2024-05-03
Supplement: s1 [file s1]

*Supplementary Material*

**Lytic and latent genetic diversity of the Epstein–Barr virus reveals Raji–related variants from southeastern Brazil associated with recombination markers**

**Paula Alves\*, Paulo Rohan, Rocio Hassan, Eliana Abdelhay**

**1 Supplementary Tables**

**Table S1 - Sampling characteristics**

| <b>ID isolate</b> | <b>Donor type</b>    | <b>Collection year</b> | <b>Tissue type</b> | <b><i>BZLF1</i> phylogeny</b> | <b><i>LMP1</i> phylogeny<br/>(Alves et al. 2022)</b> | <b>EBV type</b> | <b>Zp</b> |
|-------------------|----------------------|------------------------|--------------------|-------------------------------|------------------------------------------------------|-----------------|-----------|
| ACBR02            | asymptomatic carrier | 2018                   | saliva             | BZ-B                          | Raji                                                 | T1              | V1        |
| ACBR03            | asymptomatic carrier | 2018                   | saliva             | BZ-A                          | Raji                                                 | T2              | V3        |
| ACBR04            | asymptomatic carrier | 2018                   | saliva             | BZ-B                          | Mediterranean                                        | T1              | V1        |
| ACBR05            | asymptomatic carrier | 2018                   | saliva             | BZ-A                          | Unclassified                                         | T2              | V3        |
| ACBR07            | asymptomatic carrier | 2018                   | saliva             | BZ-B                          | B95-8                                                | T1              | V1        |
| ACBR08            | asymptomatic carrier | 2018                   | saliva             | BZ-B                          | Mediterranean                                        | T1              | V1        |
| ACBR12            | asymptomatic carrier | 2018                   | saliva             | BZ-B                          | Unclassified                                         | T1              | V1        |
| ACBR13            | asymptomatic carrier | 2018                   | saliva             | BZ-A                          | Unclassified                                         | T2              | V3        |
| ACBR14            | asymptomatic carrier | 2018                   | saliva             | BZ-B                          | Raji                                                 | T1              | V1        |
| ACBR15            | asymptomatic carrier | 2018                   | saliva             | BZ-B                          | Raji                                                 | T1              | V1        |
| ACBR16            | asymptomatic carrier | 2018                   | saliva             | BZ-B                          | Raji                                                 | T1              | V1        |
| ACBR17            | asymptomatic carrier | 2018                   | saliva             | BZ-B                          | Mediterranean                                        | T1              | V1        |
| ACBR18            | asymptomatic carrier | 2018                   | saliva             | BZ-B                          | Mediterranean                                        | T1              | V1        |
| ACBR22            | asymptomatic carrier | 2018                   | saliva             | BZ-A                          | Raji                                                 | T2              | V3        |
| ACBR23            | asymptomatic carrier | 2018                   | saliva             | BZ-B                          | Mediterranean                                        | T1              | V1        |
| ACBR24            | asymptomatic carrier | 2018                   | saliva             | BZ-A                          | Raji                                                 | T1              | V3        |
| ACBR25            | asymptomatic carrier | 2018                   | saliva             | BZ-A                          | Mediterranean                                        | T2              | V3        |
| ACBR26            | asymptomatic carrier | 2018                   | saliva             | BZ-B                          | Mediterranean                                        | T1              | V1        |

# Supplementary Material

|        |                      |      |            |      |               |    |     |
|--------|----------------------|------|------------|------|---------------|----|-----|
| ACBR27 | asymptomatic carrier | 2018 | saliva     | BZ-A | Mediterranean | T2 | V3  |
| ACBR28 | asymptomatic carrier | 2018 | saliva     | BZ-B | Raji          | T1 | V1  |
| ACBR29 | asymptomatic carrier | 2018 | saliva     | BZ-A | Mediterranean | T2 | V3  |
| ACBR30 | asymptomatic carrier | 2018 | saliva     | BZ-B | China2        | T1 | V3  |
| ACBR31 | asymptomatic carrier | 2018 | saliva     | BZ-A | Raji          | T2 | V3  |
| ACBR32 | asymptomatic carrier | 2018 | saliva     | BZ-B | Unclassified  | T1 | V1  |
| ACBR33 | asymptomatic carrier | 2018 | saliva     | BZ-B | Mediterranean | T1 | V1  |
| ACBR34 | asymptomatic carrier | 2018 | saliva     | BZ-B | Mediterranean | T1 | V1  |
| ACBR35 | asymptomatic carrier | 2018 | saliva     | BZ-A | Unclassified  | T2 | V3  |
| ACBR36 | asymptomatic carrier | 2018 | saliva     | BZ-B | Mediterranean | T1 | V1  |
| ACBR37 | asymptomatic carrier | 2019 | saliva     | BZ-B | Mediterranean | T1 | V1  |
| ACBR39 | asymptomatic carrier | 2019 | saliva     | BZ-B | Mediterranean | T1 | V1  |
| ACBR40 | asymptomatic carrier | 2019 | saliva     | BZ-B | Mediterranean | T1 | V1  |
| ACBR42 | asymptomatic carrier | 2019 | saliva     | BZ-B | Mediterranean | T1 | V1  |
| ACBR43 | asymptomatic carrier | 2019 | saliva     | BZ-B | Mediterranean | T1 | V1  |
| ACBR44 | asymptomatic carrier | 2019 | saliva     | BZ-A | B95-8         | T2 | V3  |
| ACBR46 | asymptomatic carrier | 2018 | saliva     | BZ-A | n/a           | T2 | V3  |
| ACBR47 | asymptomatic carrier | 2018 | saliva     | BZ-B | n/a           | T1 | n/a |
| ACBR48 | asymptomatic carrier | 2018 | saliva     | BZ-B | n/a           | T1 | n/a |
| ACBR49 | asymptomatic carrier | 2018 | saliva     | BZ-B | n/a           | T1 | V1  |
| ACBR50 | asymptomatic carrier | 2018 | saliva     | BZ-B | n/a           | T1 | n/a |
| ACBR51 | asymptomatic carrier | 2018 | saliva     | BZ-B | n/a           | T1 | V1  |
| ACBR52 | asymptomatic carrier | 2018 | saliva     | BZ-B | n/a           | T1 | V1  |
| ACBR53 | asymptomatic carrier | 2018 | saliva     | BZ-A | n/a           | T2 | V3  |
| ACBR54 | asymptomatic carrier | 2018 | saliva     | BZ-B | n/a           | T1 | V1  |
| ACBR55 | asymptomatic carrier | 2019 | saliva     | BZ-A | n/a           | T1 | V3  |
| ACBR56 | asymptomatic carrier | 2019 | saliva     | BZ-B | n/a           | T1 | V1  |
| BLBR01 | Burkitt lymphoma     | 1995 | lymph node | BZ-B | Mediterranean | T1 | V1  |
| BLBR02 | Burkitt lymphoma     | 2001 | lymph node | BZ-B | Mediterranean | T1 | V1  |
| BLBR03 | Burkitt lymphoma     | 2002 | lymph node | BZ-B | Mediterranean | T1 | V1  |

|         |                                  |      |                  |      |               |     |     |
|---------|----------------------------------|------|------------------|------|---------------|-----|-----|
| BLBR04  | Burkitt lymphoma                 | 2003 | lymph node       | BZ-B | Raji          | T1  | V1  |
| BLBR05  | Burkitt lymphoma                 | 2019 | lymph node       | BZ-B | Raji          | T1  | V1  |
| BLBR06  | Burkitt lymphoma                 | 2005 | lymph node       | BZ-B | Raji          | T1  | V1  |
| CHLBR01 | classic Hodgkin lymphoma         | 2002 | lymph node       | BZ-B | Mediterranean | T1  | V1  |
| CHLBR02 | classic Hodgkin lymphoma         | 2002 | lymph node       | BZ-B | B95-8         | T1  | V1  |
| CHLBR04 | classic Hodgkin lymphoma         | 2002 | lymph node       | BZ-B | Raji          | T1  | V1  |
| CHLBR05 | classic Hodgkin lymphoma         | 2002 | lymph node       | BZ-B | Mediterranean | T1  | V1  |
| CHLBR06 | classic Hodgkin lymphoma         | 2002 | lymph node       | BZ-A | B95-8         | T2  | V3  |
| CHLBR08 | classic Hodgkin lymphoma         | 2003 | lymph node       | BZ-A | Raji          | T1  | V3  |
| CHLBR09 | classic Hodgkin lymphoma         | 2003 | lymph node       | BZ-B | Mediterranean | T1  | V1  |
| CHLBR10 | classic Hodgkin lymphoma         | 2003 | lymph node       | BZ-A | Raji          | T1  | V3  |
| CHLBR15 | classic Hodgkin lymphoma         | 2004 | lymph node       | BZ-B | Raji          | T1  | V1  |
| CHLBR18 | classic Hodgkin lymphoma         | 2005 | lymph node       | BZ-A | Raji          | T2  | V3  |
| CHLBR23 | classic Hodgkin lymphoma         | 2005 | lymph node       | BZ-B | Mediterranean | T1  | V1  |
| CHLBR24 | classic Hodgkin lymphoma         | 2005 | lymph node       | BZ-B | Mediterranean | T1  | V1  |
| CHLBR26 | classic Hodgkin lymphoma         | 2005 | lymph node       | BZ-A | Raji          | T1  | n/a |
| PTER01  | post-transplant EBV reactivation | 2019 | peripheral blood | BZ-B | n/a           | T1  | V1  |
| PTER02  | post-transplant EBV reactivation | 2005 | peripheral blood | BZ-B | n/a           | n/a | V1  |
| PTER03  | post-transplant EBV reactivation | 2005 | peripheral blood | BZ-B | n/a           | T1  | V1  |
| PTER04  | post-transplant EBV reactivation | 2005 | peripheral blood | BZ-B | n/a           | T1  | V1  |
| PTER05  | post-transplant EBV reactivation | 2006 | peripheral blood | BZ-B | n/a           | T1  | V1  |
| PTER06  | post-transplant EBV reactivation | 2006 | peripheral blood | BZ-B | n/a           | T1  | V1  |

n/a: not applicable.

**Table S2 - List of the geographic reference sequences used in phylogenetics analysis.**

| <b>ID</b>     | <b>Database</b> | <b>Access number</b> | <b>Country/Region<br/>origin</b> |
|---------------|-----------------|----------------------|----------------------------------|
| B95-8         | GenBank         | NC_007605            | USA                              |
| AG876         | GenBank         | DQ279927             | Ghana                            |
| GD1           | GenBank         | AY961628             | China                            |
| GD2           | GenBank         | HQ020558             | China                            |
| Raji          | GenBank         | KF717093             | Nigeria                          |
| Jijoye        | GenBank         | LN827800             | Nigeria                          |
| Mutu          | GenBank         | KC207814             | Kenya                            |
| Daudi         | GenBank         | LN827545             | Kenya                            |
| HKNPC1        | GenBank         | JQ009376             | Hong Kong                        |
| M81           | GenBank         | KF373730             | Hong Kong                        |
| Akata         | GenBank         | KC207813             | Japan                            |
| Weweak2       | GenBank         | LN827544             | Papua New Guinea                 |
| BL37          | GenBank         | LN827526             | Africa                           |
| M-ABA         | GenBank         | LN827527             | Africa                           |
| GK_BL42       | GenBank         | MG298834             | Africa                           |
| GK_BL44       | GenBank         | MG298835             | Africa                           |
| GK_BL60       | GenBank         | MG298836             | Africa                           |
| GK_PUT        | GenBank         | MG298842             | Africa                           |
| L591          | GenBank         | LN827523             | Germany                          |
| DF_Tonsil_T49 | GenBank         | MG298829             | Argentina                        |
| DF_Tonsil_T47 | GenBank         | MG298828             | Argentina                        |
| CV-ARG        | GenBank         | KR063343             | Argentina                        |
| VA            | GenBank         | KT001102             | Argentina                        |
| SG            | GenBank         | KT001103             | Argentina                        |
| sLCL-IS1.13   | GenBank         | LN827578             | Australia                        |
| sLCL-IS1.07   | GenBank         | LN827594             | Australia                        |
| sLCL-IM1.16   | GenBank         | LN827799             | Australia                        |
| SCL           | GenBank         | KP968259             | Brazil                           |

|                |         |          |                  |
|----------------|---------|----------|------------------|
| VGO            | GenBank | KP968260 | Brazil           |
| CCH            | GenBank | KP968257 | Brazil           |
| MP             | GenBank | KP968258 | Brazil           |
| RPF            | GenBank | KR063344 | Brazil           |
| FNR            | GenBank | KR063345 | Brazil           |
| C666-1         | GenBank | LN827525 | China            |
| HLT011         | GenBank | MK540263 | China            |
| HS007          | GenBank | MK540266 | China            |
| HS027          | GenBank | MK540282 | China            |
| NKLT002        | GenBank | MK540303 | China            |
| NPCT098        | GenBank | MK540453 | China            |
| YCCEL1         | GenBank | LN827561 | South Korea      |
| pLCL-TRL1-pre  | GenBank | LN824207 | USA              |
| pLCL-TRL595    | GenBank | LN827559 | USA              |
| GK_Farage      | GenBank | MG298839 | USA              |
| JC_002         | GenBank | MG298864 | USA              |
| GK_BL67        | GenBank | MG298837 | France           |
| IMS_Saliva_177 | GenBank | MG298849 | India            |
| JM_LCL_MU      | GenBank | MG298874 | Indonesia        |
| JM_NKTLY_96.1  | GenBank | MG298877 | Indonesia        |
| JM_NPC_bru_377 | GenBank | MG298885 | Indonesia        |
| RK_LCL_L2      | GenBank | MG298912 | Papua New Guinea |
| RK_LCL_L3      | GenBank | MG298914 | Papua New Guinea |
| sLCL-1.19      | GenBank | LN827562 | Kenya            |
| sLCL-1.24      | GenBank | LN827568 | Kenya            |
| sLCL-BL1.20    | GenBank | LN827571 | Kenya            |
| sLCL-2.21      | GenBank | LN827587 | Kenya            |
| sLCL-2.22      | GenBank | LN831023 | Kenya            |
| GK_Akuba       | GenBank | MG298830 | Kenya            |
| HL09           | GenBank | LN827522 | United Kingdom   |
| HL11           | GenBank | LN827524 | United Kingdom   |
| IMS_Saliva_10  | GenBank | MG298844 | United Kingdom   |

|                |         |          |                |
|----------------|---------|----------|----------------|
| IMS_Saliva_70  | GenBank | MG298861 | United Kingdom |
| IMS_Saliva_71  | GenBank | MG298862 | United Kingdom |
| AH_Saliva_8192 | GenBank | MG298823 | Taiwan         |
| AH_Saliva_8471 | GenBank | MG298824 | Taiwan         |
| AH_Saliva_9077 | GenBank | MG298826 | Taiwan         |
| GK_LY47        | GenBank | MG298840 | Uganda         |
| JM_Saliva_18   | GenBank | MG298899 | Uganda         |
| JM_Saliva_20   | GenBank | MG298900 | Uganda         |
| JM_Saliva_33   | GenBank | MG298901 | Uganda         |
| JM_Saliva_5    | GenBank | MG298902 | Uganda         |

**Table S3: List of recombination-inducing DNA motifs evaluated in this work.**

| Recombination-inducing DNA motif                | Motif    | Reference              |
|-------------------------------------------------|----------|------------------------|
| core chi-like recombination sequence            | TGGTGG   | Chuzhanova et al. 2009 |
| classical meiotic recombination motif           | CCTCCCCT | Myers et al. 2005      |
| initiate recombination events                   | TGGAG    | Bengesser et al. 2010  |
|                                                 | CCCAG    |                        |
| human Ig class switch sequence                  | GGGCT    | Chuzhanova et al. 2009 |
| arrest DNA synthesis by DNA polymerase $\alpha$ | AGGAG    | Cullen et al. 2002     |

T: thymine; G: guanine; A: adenine; C: cytosine.
